# Supplementary material
Source: PubMed Central journal article supplement (PMC4498224)
Supplement: supp_dev085_dev085supp_table1.pdf [file supp_dev085_dev085supp_table1.pdf]

**Supplementary Table S1 Odds ratios (OR) and P-values for the association of PCOS with ten SNPs (single-nucleotide polymorphism) identified in a genome-wide association study of Han Chinese women with PCOS.**

| SNP-allele  | Nearest Gene      | OR Chinese | Frq Chinese | Samples  | P     | Study OR (95% CI) | Frq <sub>cases</sub> | Frq <sub>controls</sub> | P <sub>Combined</sub> | Combined OR (95% CI) | P <sub>Het</sub> |
|-------------|-------------------|------------|-------------|----------|-------|-------------------|----------------------|-------------------------|-----------------------|----------------------|------------------|
| rs2268361-T | <i>FSHR</i>       | 0.84       | 0.496       | Boston I | 0.11  | 0.83 (0.68–1.01)  | 0.61                 | 0.65                    | 0.009                 | 0.83 (0.72–0.95)     | 0.95             |
| 2p16.3      |                   |            |             | Greek    | 0.048 | 0.79 (0.54–1.00)  | 0.57                 | 0.62                    |                       |                      |                  |
| rs2349415-T | <i>FSHR</i>       | 1.33       | 0.181       | Boston I | 0.61  | 1.07 (0.87–1.24)  | 0.35                 | 0.33                    | 0.68                  | 1.03 (0.9–1.18)      | 0.71             |
| 2p16.3      |                   |            |             | Greek    | 0.97  | 1.00 (0.83–1.22)  | 0.37                 | 0.37                    |                       |                      |                  |
| rs4385527-A | <i>C9orf3</i>     | 0.78       | 0.219       | Boston I | 0.12  | 0.86 (0.71–1.04)  | 0.4                  | 0.43                    | 0.19                  | 0.91 (0.80–1.04)     | 0.49             |
| 9q22.32     |                   |            |             | Greek    | 0.63  | 0.96 (0.79–1.15)  | 0.45                 | 0.47                    |                       |                      |                  |
| rs3802457-A | <i>C9orf3</i>     | 0.69       | 0.096       | Boston I | 0.36  | 0.86 (0.49–1.53)  | 0.026                | 0.03                    | 0.47                  | 0.85 (0.55–1.32)     | 0.86             |
| 9q22.32     |                   |            |             | Greek    | 0.67  | 0.88 (0.49–1.59)  | 0.023                | 0.026                   |                       |                      |                  |
| rs1894116-G | <i>YAP1</i>       | 1.30       | 0.194       | Boston I | 0.37  | 1.13 (0.83–1.52)  | 0.11                 | 0.1                     | 0.087                 | 1.17 (0.97–1.32)     | 0.64             |
| 11q22.1     |                   |            |             | Greek    | 0.12  | 1.26 (0.94–1.67)  | 0.14                 | 0.11                    |                       |                      |                  |
| rs705702-G  | <i>RAB5B/SUOX</i> | 1.32       | 0.245       | Boston I | 0.85  | 0.95 (0.78–1.16)  | 0.33                 | 0.34                    | 0.65                  | 0.97 (0.83–1.12)     | 0.43             |
| 12q13.2     |                   |            |             | Greek    | 0.38  | 1.10 (0.89–1.36)  | 0.27                 | 0.25                    |                       |                      |                  |
| rs2272046-C | <i>HMG2</i>       | 0.67       | 0.093       | Boston I | 0.96  | 1.00 (0.56–1.80)  | 0.026                | 0.026                   | 0.26                  | 1.23 (0.79–1.51)     | 0.37             |
| 12q14.3     |                   |            |             | Greek    | 0.15  | 1.59 (0.84–2.99)  | 0.031                | 0.019                   |                       |                      |                  |
| rs4784165-G | <i>TOX3</i>       | 1.26       | 0.325       | Boston I | 0.03  | 1.36 (1.10–1.67)  | 0.32                 | 0.26                    | 0.02                  | 1.16 (1.03–1.27)     | 0.04             |
| 16q12.1     |                   |            |             | Greek    | 0.76  | 1.03 (0.84–1.26)  | 0.31                 | 0.31                    |                       |                      |                  |
| rs2059807-A | <i>INSR</i>       | 1.24       | 0.301       | Boston I | 0.61  | 1.09 (0.90–1.32)  | 0.36                 | 0.39                    | 0.59                  | 1.04 (0.9–1.19)      | 0.2              |
| 19p13.3     |                   |            |             | Greek    | 0.16  | 1.14 (0.93–1.39)  | 0.36                 | 0.33                    |                       |                      |                  |
| rs6022786-A | <i>SUMO1P1</i>    | 1.24       | 0.339       | Boston I | 0.37  | 0.95 (0.74–1.13)  | 0.42                 | 0.43                    | 0.91                  | 0.99 (0.87–1.14)     | 0.52             |
| 20q13.2     |                   |            |             | Greek    | 0.16  | 1.04 (0.86–1.25)  | 0.47                 | 0.46                    |                       |                      |                  |

For each SNP, the table includes the OR and frequency (Frq) of the risk allele in the Chinese population, the P-value, OR, and frequency in cases and controls for the Boston I and Greek sample sets, and the P-value ( $P_{\text{combined}}$ ) and OR ( $OR_{\text{combined}}$ ) for the two samples sets combined using a Mantel–Haenszel model (Mantel and Haenszel, 1959), together with the P-value,  $P_{\text{Het}}$ , for the test of heterogeneity in the effect estimates between the sample sets.
