# Supplementary material
Source: PubMed Central journal article supplement (PMC4498224)
Supplement: supp_dev085_dev085supp_table3.pdf [file supp_dev085_dev085supp_table3.pdf]

**Supplementary Table SIII Power analysis for each variant in the current replication cohorts.**

| SNP-allele             | Nearest gene      | OR Chinese | Frq Chinese | Frq <sub>controls</sub> | Ave allele freq in controls in our 3 samples | Power alpha = 0.0033 | Power alpha = 0.05 |
|------------------------|-------------------|------------|-------------|-------------------------|----------------------------------------------|----------------------|--------------------|
| rs2268361-T<br>2p16.3  | <i>FSHR</i>       | 0.84       | 0.496       | 0.65<br>0.62<br>0.63    | 0.63                                         | 0.8525               | 0.9786             |
| rs2349415-T<br>2p16.3  | <i>FSHR</i>       | 1.33       | 0.181       | 0.33<br>0.37<br>0.34    | 0.35                                         | 0.999                | 1                  |
| rs4385527-A<br>9q22.32 | <i>C9orf3</i>     | 0.78       | 0.219       | 0.43<br>0.47<br>0.42    | 0.44                                         | 0.997                | 1                  |
| rs3802457-A<br>9q22.32 | <i>C9orf3</i>     | 0.69       | 0.096       | 0.03<br>0.026<br>0.031  | 0.03                                         | 0.3895               | 0.7574             |
| rs1894116-G<br>11q22.1 | <i>YAP1</i>       | 1.3        | 0.194       | 0.1<br>0.11<br>0.083    | 0.10                                         | 0.8294               | 0.9732             |
| rs705702-G<br>12q13.2  | <i>RAB5B/SUOX</i> | 1.32       | 0.245       | 0.34<br>0.25<br>0.32    | 0.30                                         | 0.999                | 1                  |
| rs2272046-C<br>12q14.3 | <i>HMGGA2</i>     | 0.67       | 0.093       | 0.026<br>0.019<br>0.025 | 0.02                                         | 0.2713               | 0.6441             |
| rs4784165-G<br>16q12.1 | <i>TOX3</i>       | 1.26       | 0.325       | 0.26<br>0.31<br>0.27    | 0.28                                         | 0.9788               | 0.9987             |
| rs2059807-G<br>19p13.3 | <i>INSR</i>       | 1.24       | 0.301       | 0.39<br>0.67<br>0.61    | 0.56                                         | 0.9778               | 0.9986             |
| rs6022786-A<br>20q13.2 | <i>SUMO1P1</i>    | 1.24       | 0.339       | 0.43<br>0.46<br>0.44    | 0.44                                         | 0.9812               | 0.9989             |

For each SNP, the table includes the odds ratio (OR) and frequency (Frq) of the risk allele in the Chinese population, the frequency in the control subjects in the three cohorts studied (Boston I, Greek and Boston EMR), the average allele frequency in the three cohorts and the power at the alpha levels indicated, assuming a prevalence of PCOS of 8% and the effect size demonstrated in the Han Chinese study. The three cohorts provided sufficient power to replicate the Han Chinese variants at alpha = 0.05. The majority also had sufficient power at an alpha = 0.0033.
